# Supplementary material for: Synthesis and biological evaluation of halogenated phenoxychalcones and their corresponding pyrazolines as cytotoxic agents in human breast cancer
Source: PubMed Central journal article supplement (PMC8667918; doi:10.1080/14756366.2021.1998023), 2021-12-11

# Compound 2a

Khaled Omar\_H\_1R.10.fid — Khaled Omar\_H\_1R

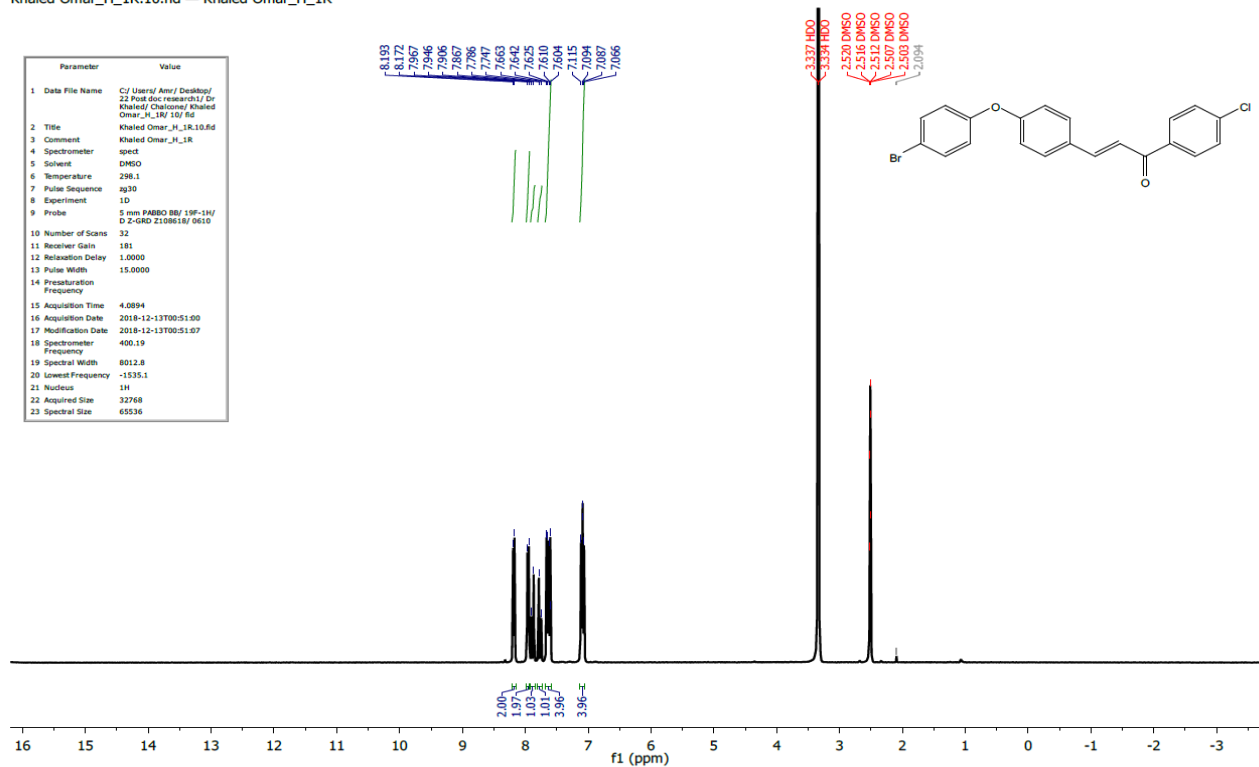

Khaled Omar\_C\_1R.10.fid — Khaled Omar\_C\_1R

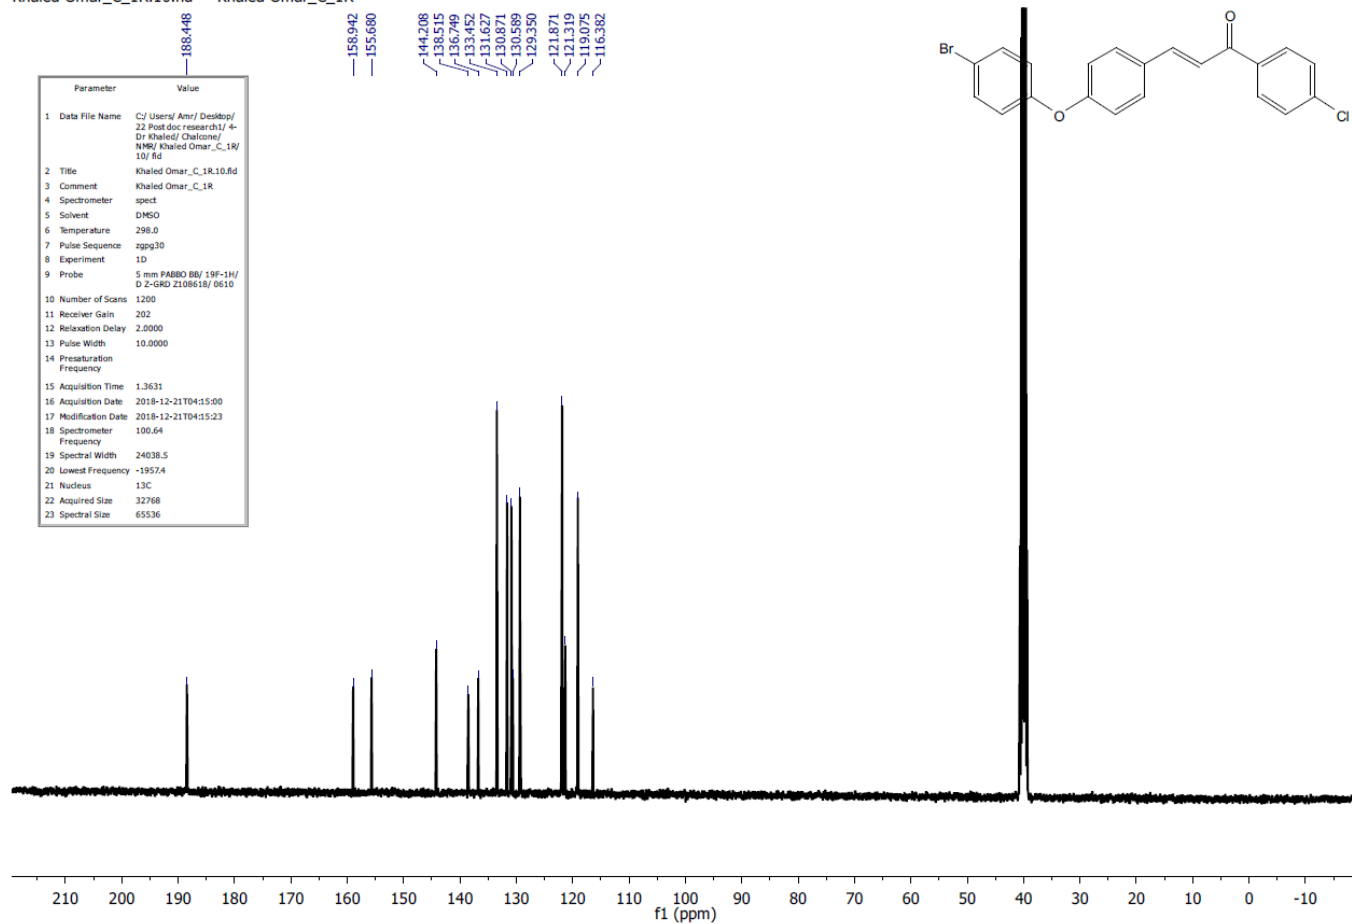

# Compound 2b

Khaled Omar\_H\_2R.10.fid — Khaled Omar\_H\_2R

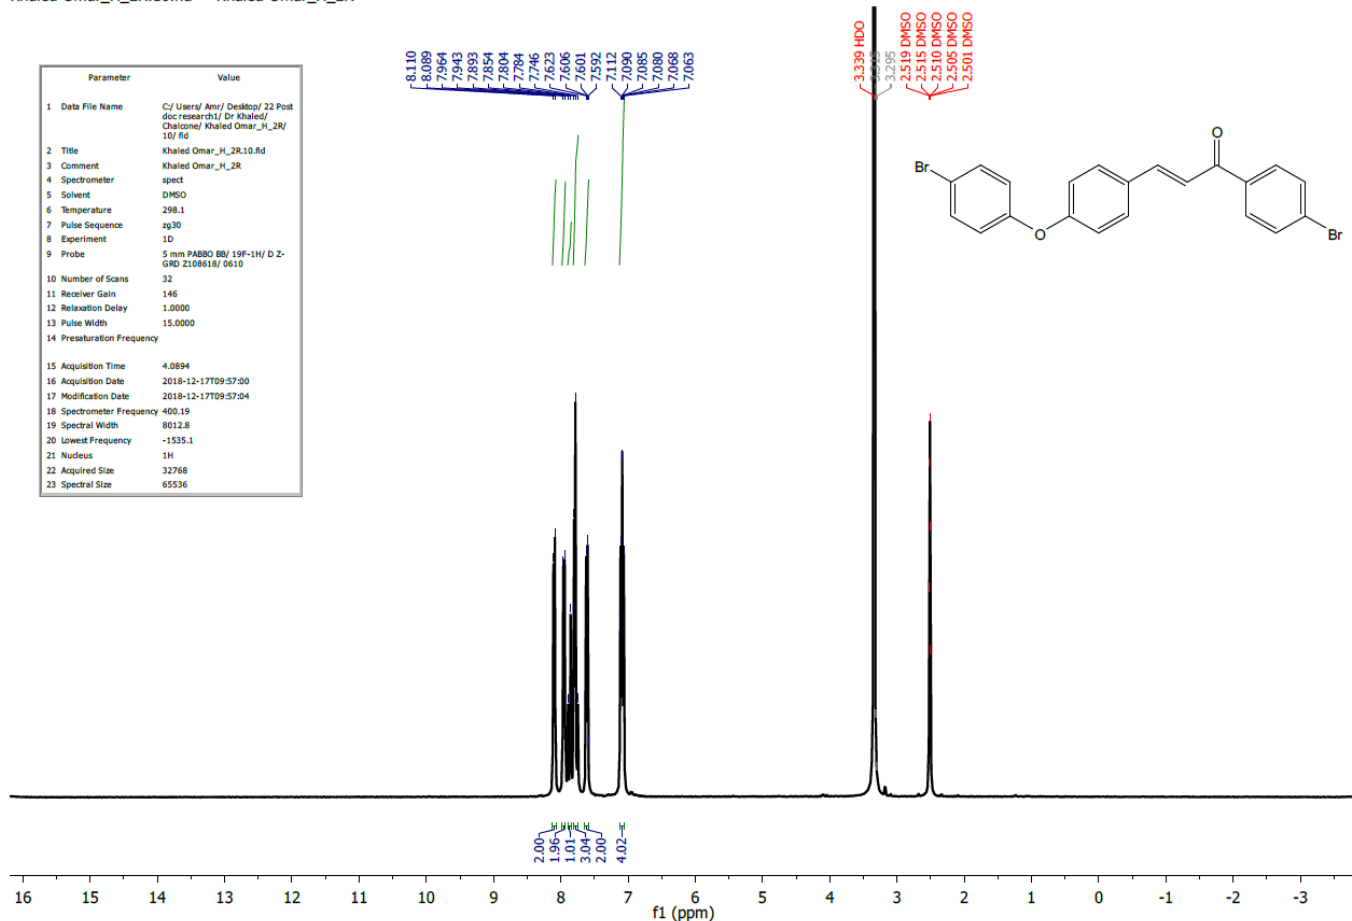

Khaled Omar\_C\_2R.10.fid — Khaled Omar\_C\_2R

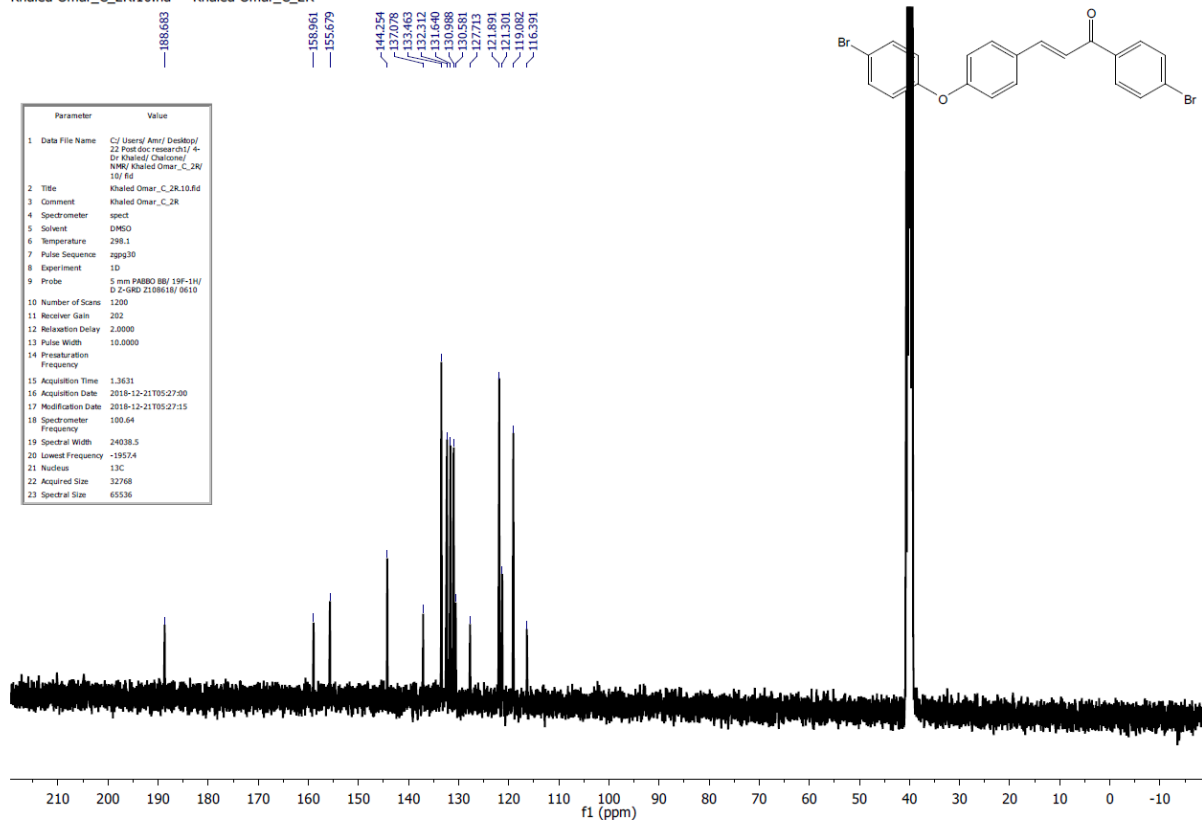

# Compound 2c

Khaled Omar\_H\_3R.10.fid — Khaled Omar\_H\_3R

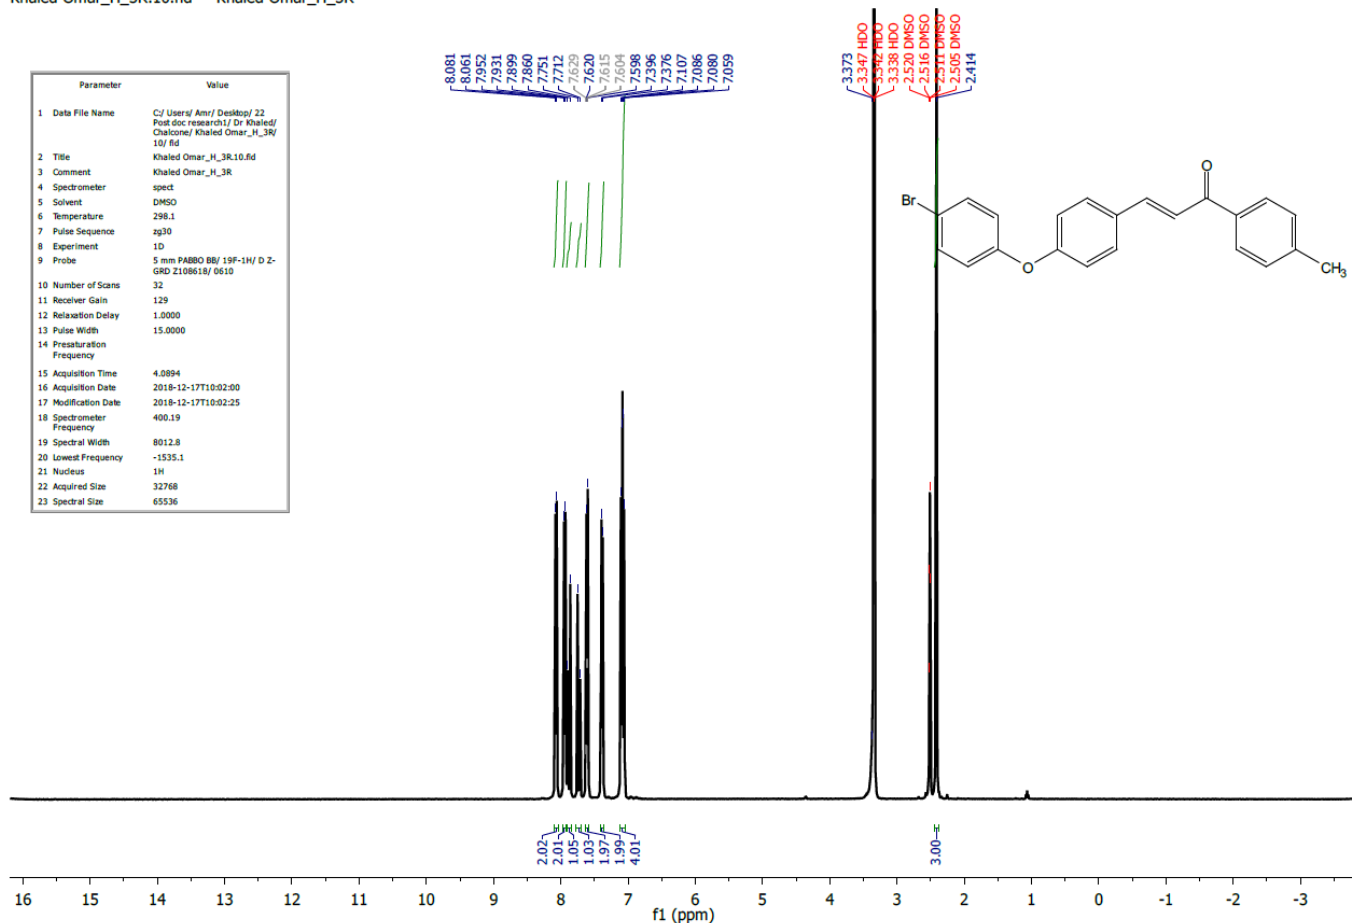

Khaled Omar\_C\_3R.10.fid — Khaled Omar\_C\_3R

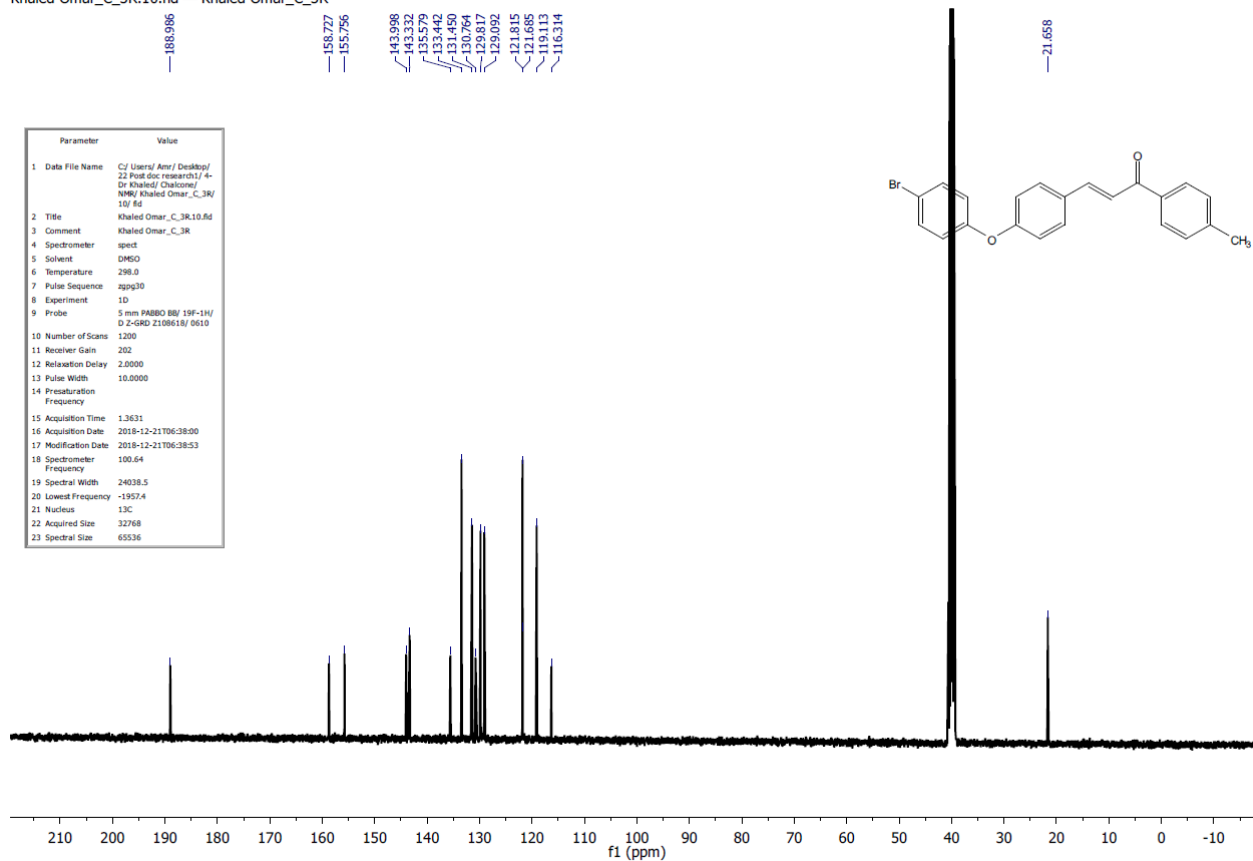

# Compound 2d

Peter Amir\_H\_1E.10.fid — Peter Amir\_H\_1E

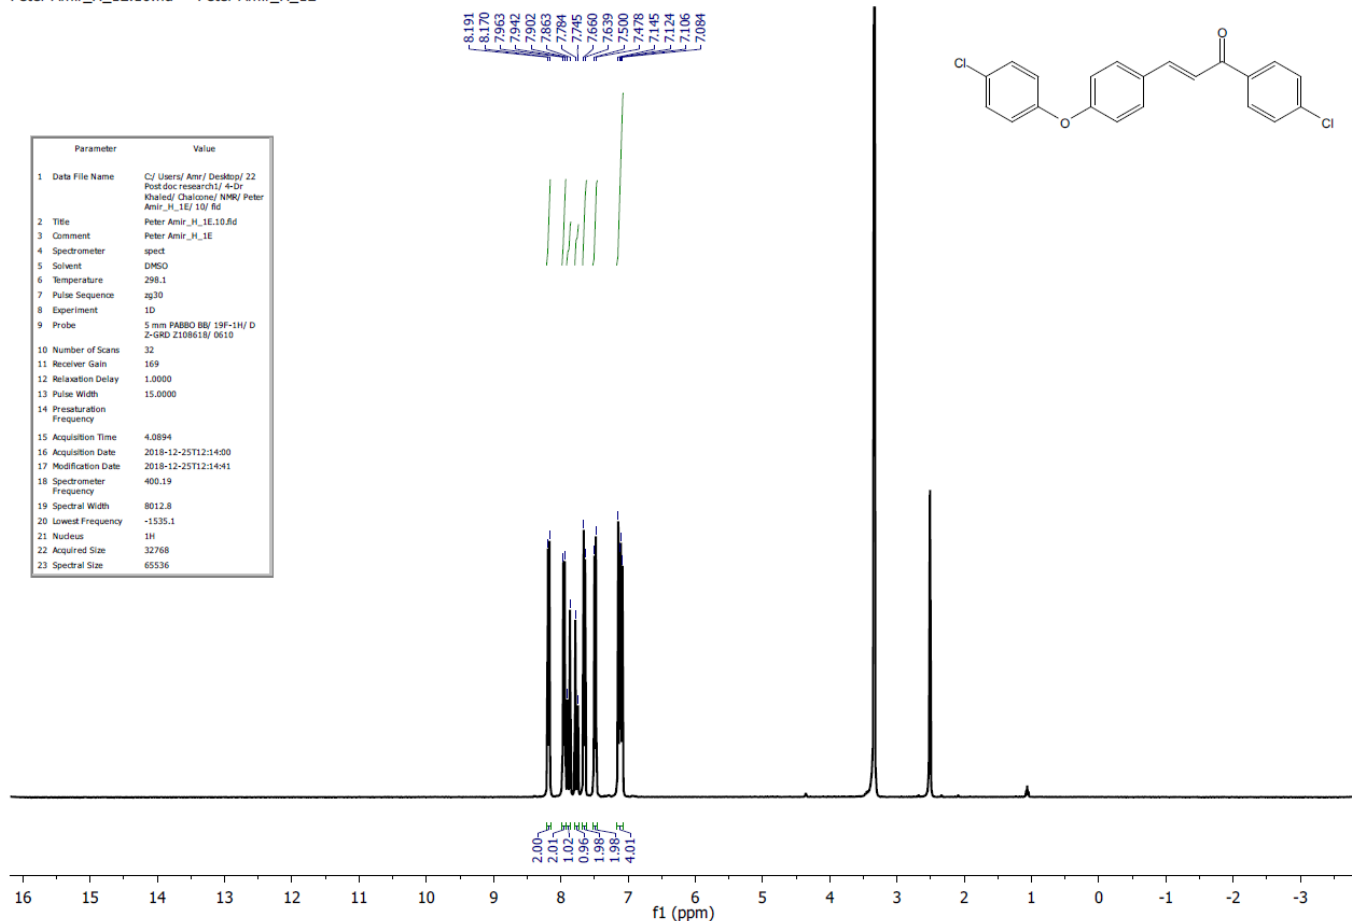

Peter Amir\_C\_1E.10.fid — Peter Amir\_C\_1E

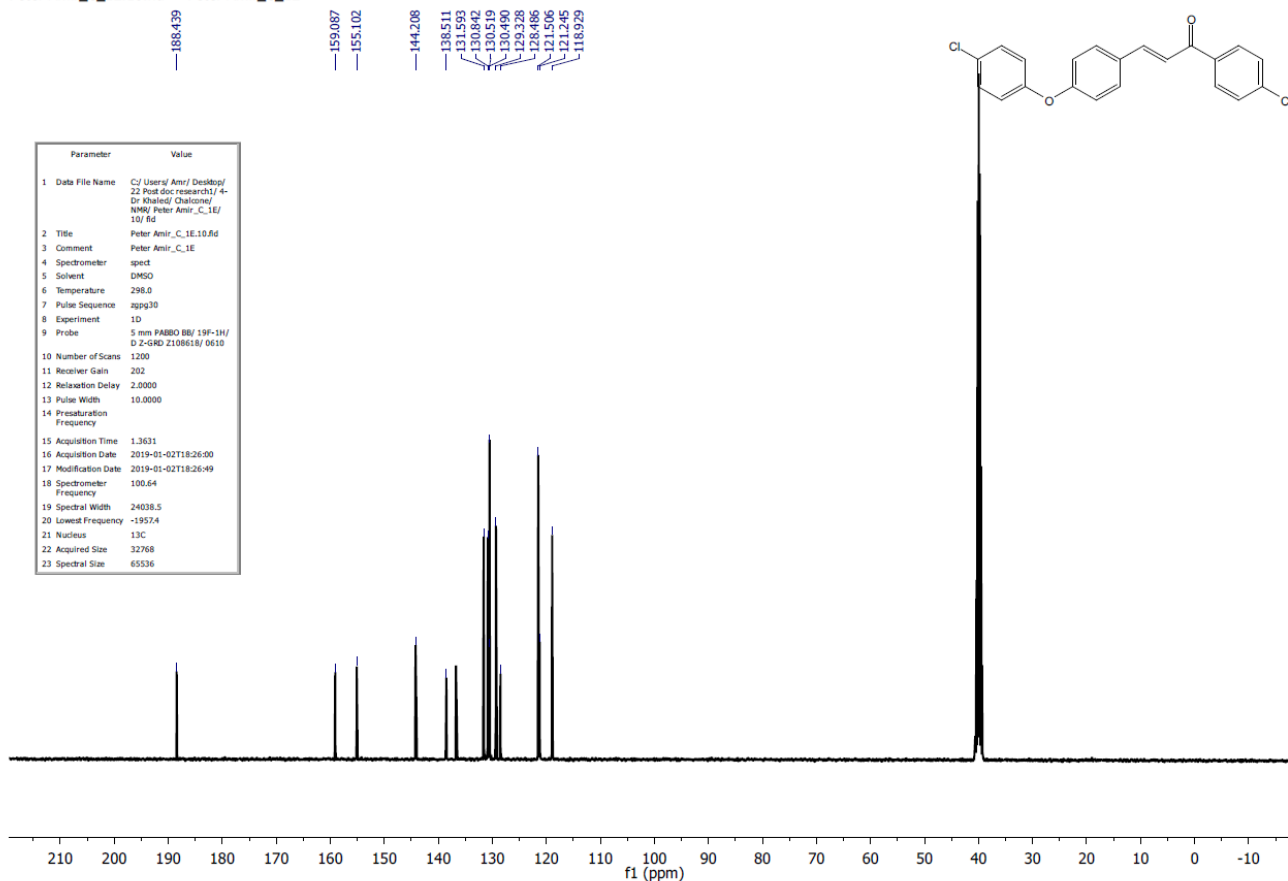

# Compound 2e

Peter Amir\_H\_2E.10.fid — Peter Amir\_H\_2E

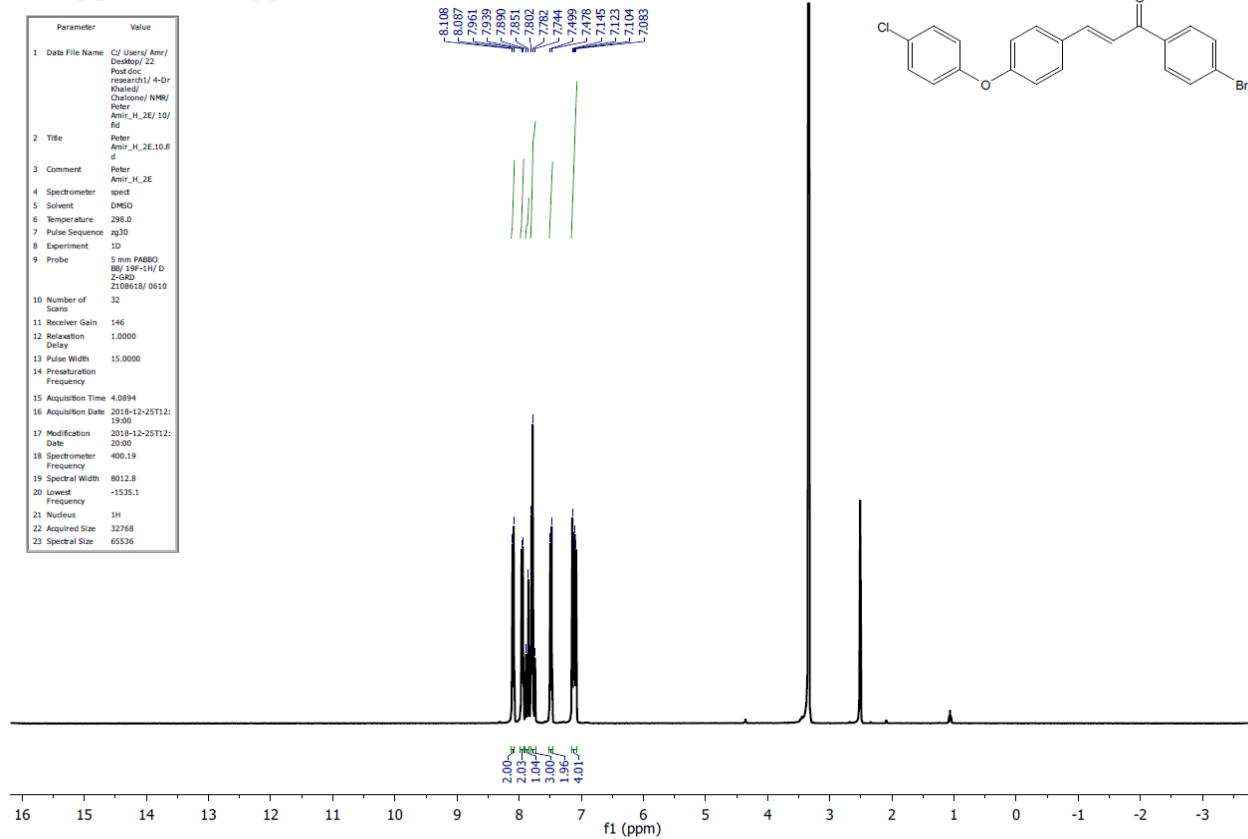

Peter Amir\_C\_2E.10.fid — Peter Amir\_C\_2E

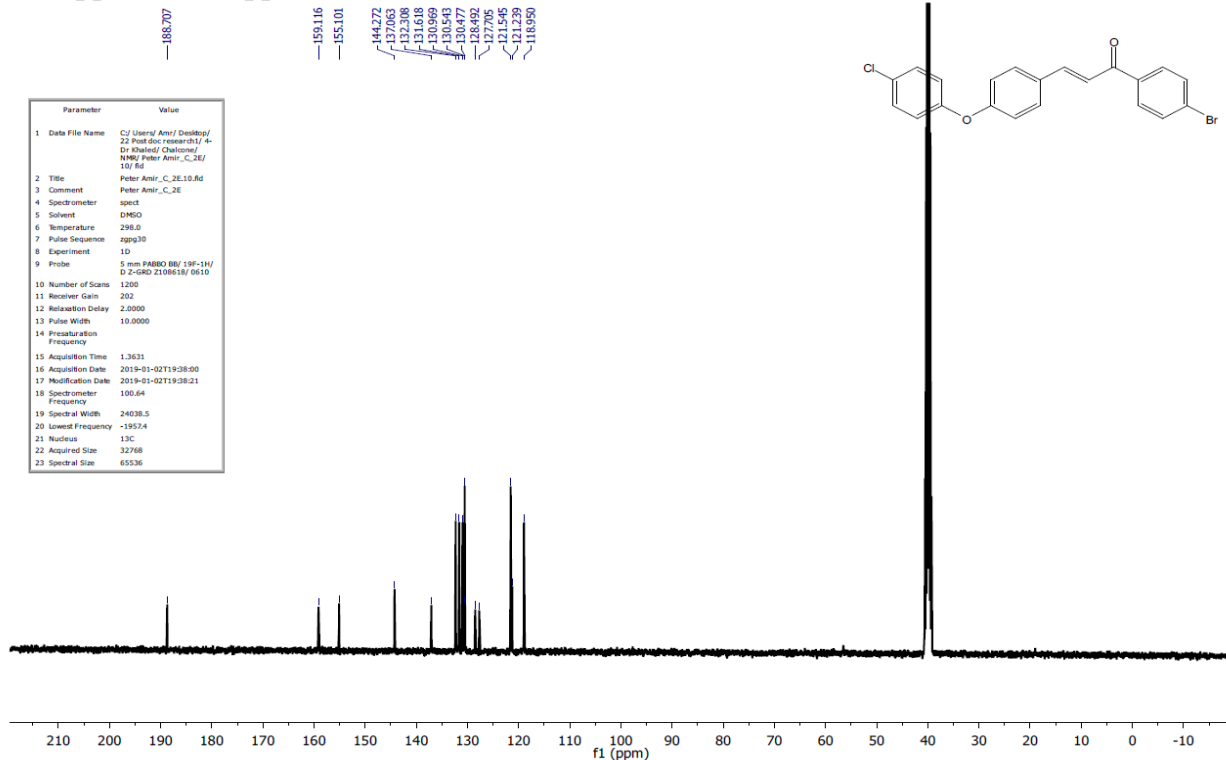

# Compound 2f

Eman Omar\_H\_3E.10.fid — Eman Omar\_H\_3E

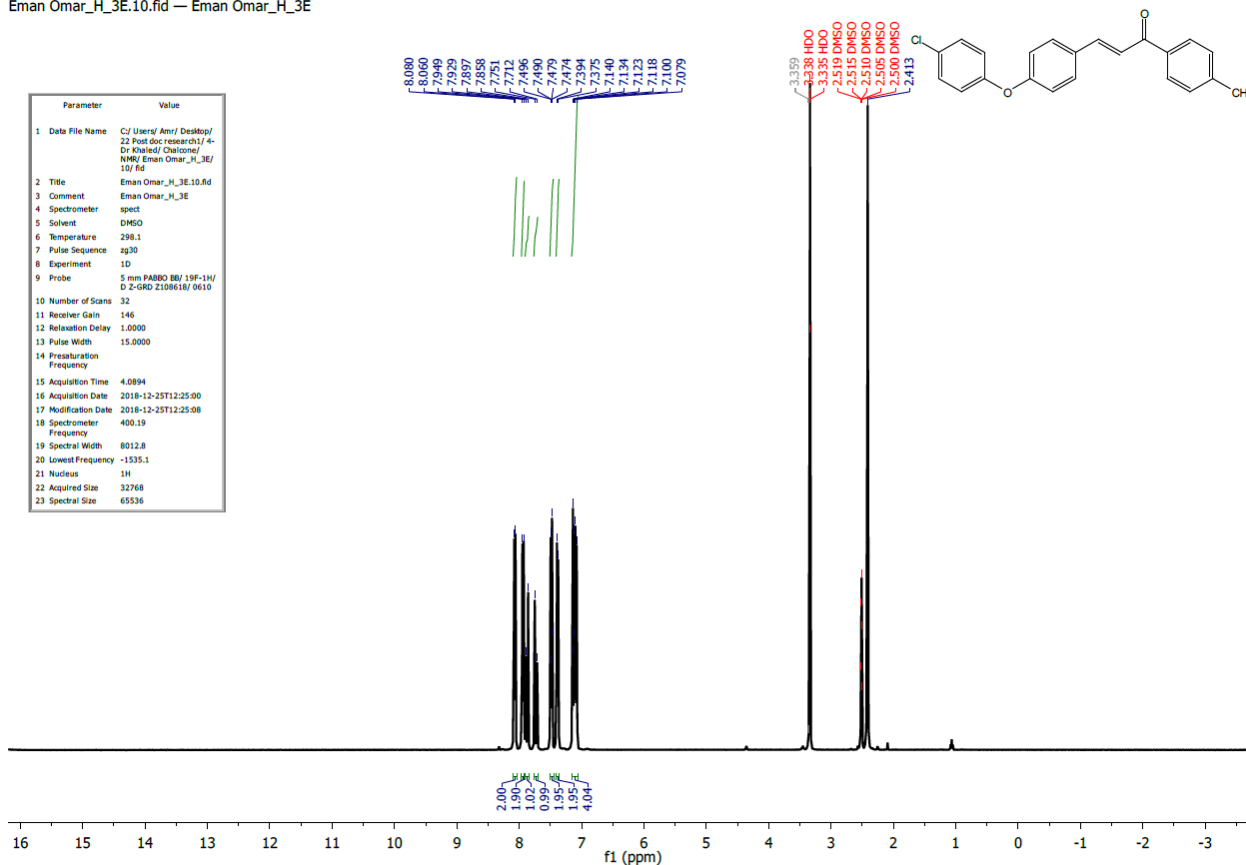

Eman Omar\_C\_3E.10.fid — Eman Omar\_C\_3E

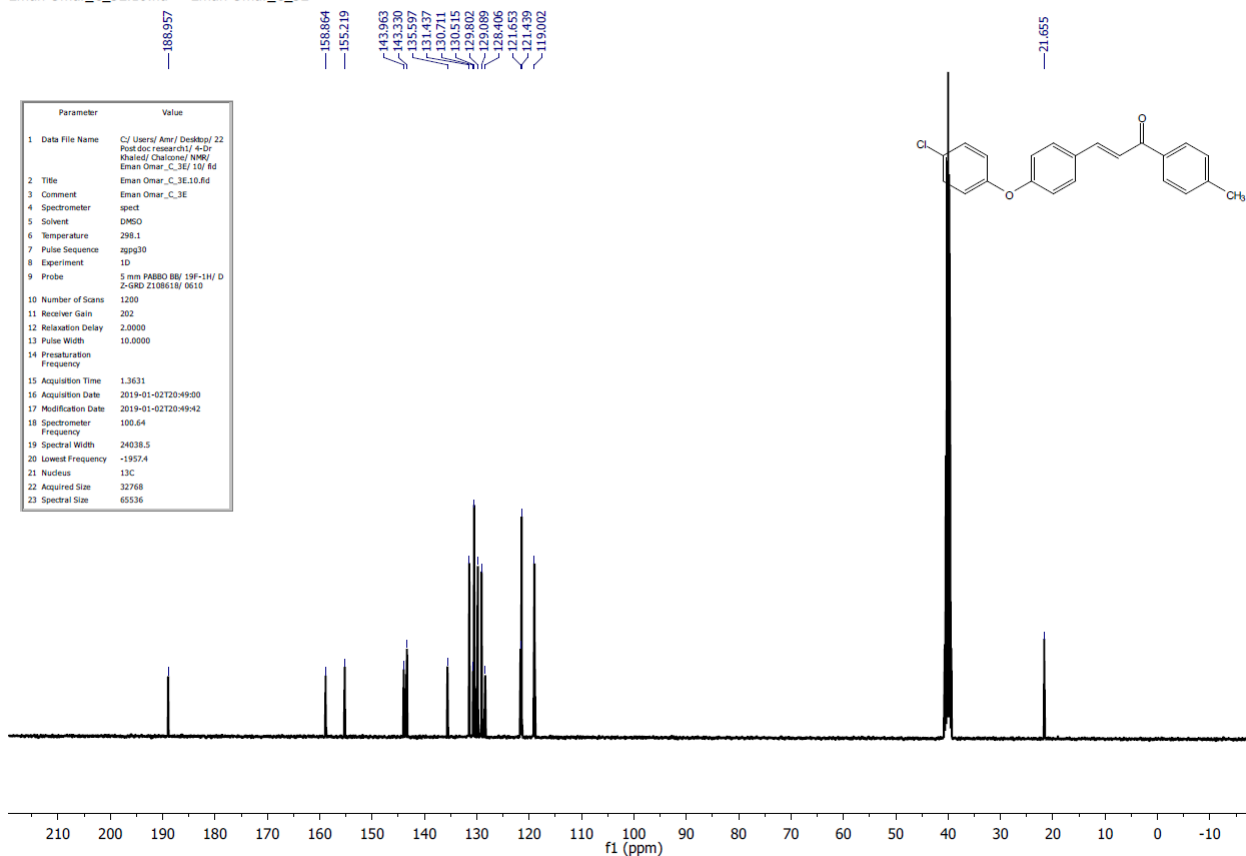

# Compound 3a

Peter Amir\_H\_1K.10.fid — Peter Amir\_H\_1K

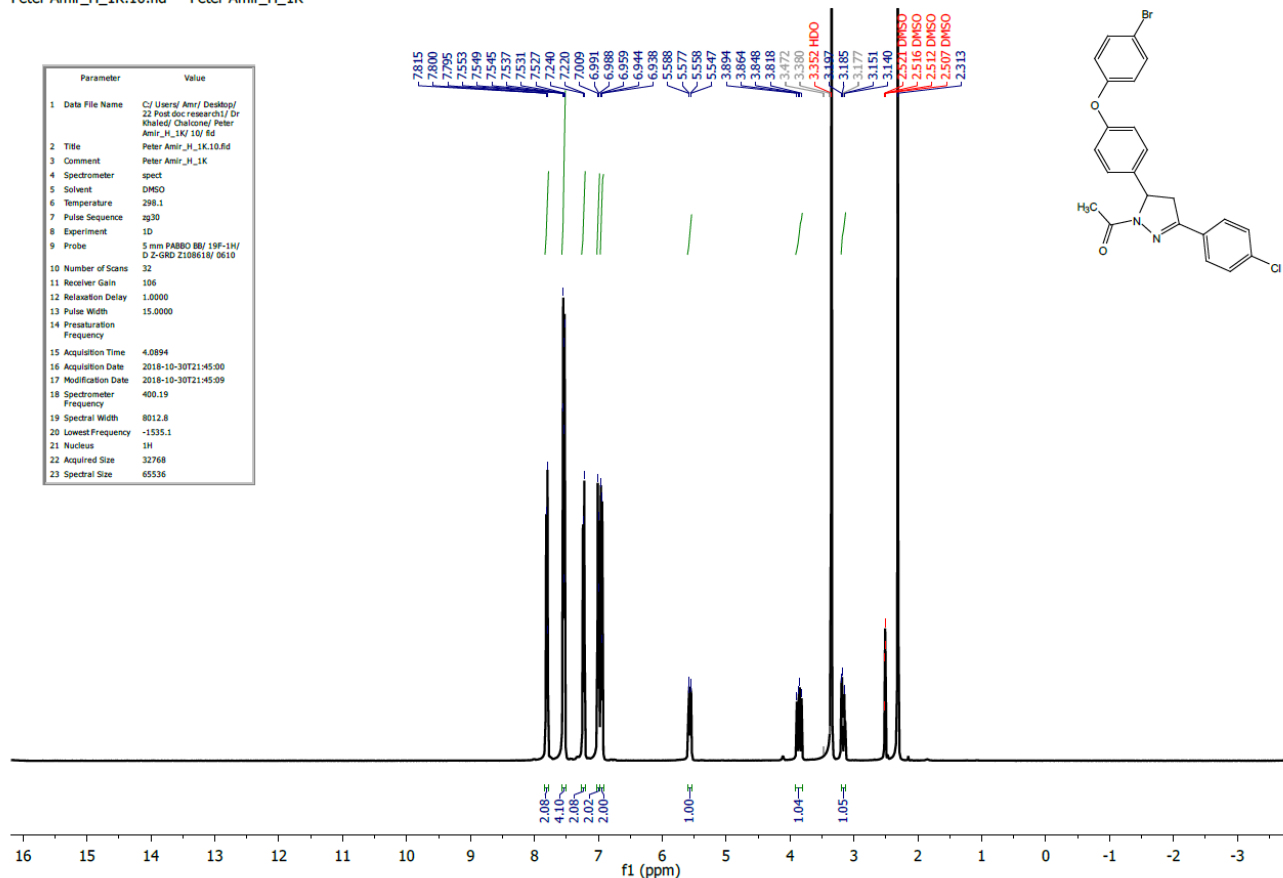

Peter Amir\_C\_1K.10.fid — Peter Amir\_C\_1K

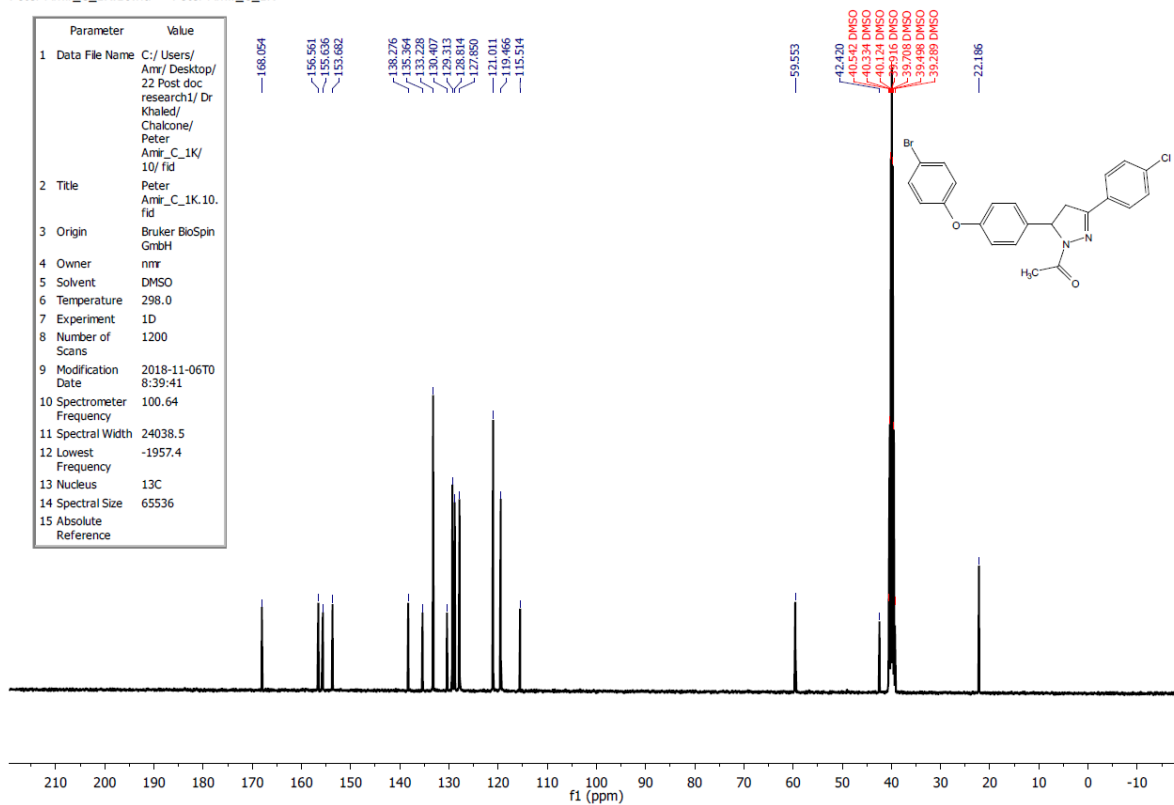

# Compound 3b

Eman Omar\_H\_2K.10.fid — Eman Omar\_H\_2K

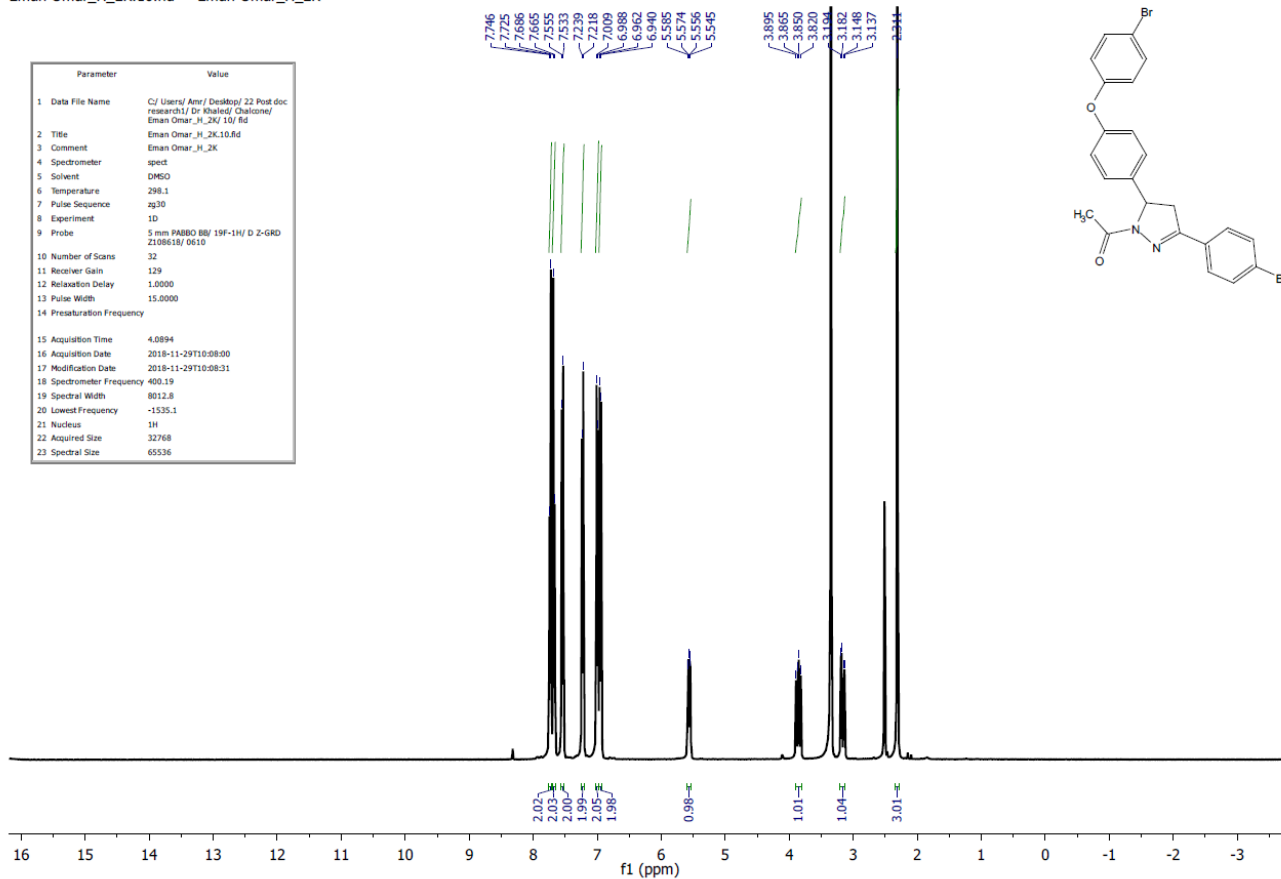

Eman Omar\_C\_2K.10.fid — Eman Omar\_C\_2K

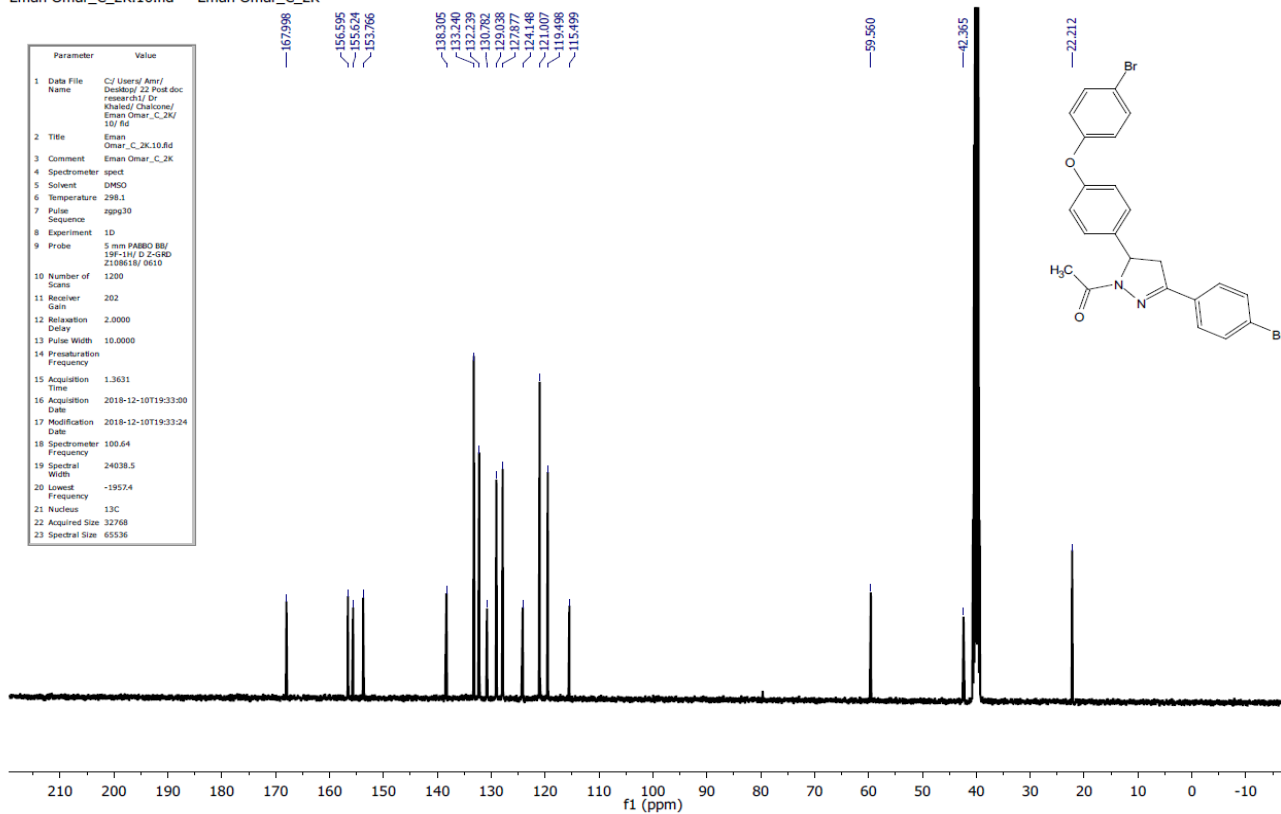



# Compound 3c

Eman Omar\_H\_3K.10.fid — Eman Omar\_H\_3K

| Parameter                  | Value                                                                                      |
|----------------------------|--------------------------------------------------------------------------------------------|
| 1 Data File Name           | C:/Users/Amer/Desktop/22 Post doc research/1/ Dr Khaled/ Chalcone/ Eman Omar_H_3K/ 10/ fid |
| 2 Title                    | Eman Omar_H_3K.10.fid                                                                      |
| 3 Comment                  | Eman Omar_H_3K                                                                             |
| 4 Spectrometer             | spect                                                                                      |
| 5 Solvent                  | DMSO                                                                                       |
| 6 Temperature              | 296.1                                                                                      |
| 7 Pulse Sequence           | zg30                                                                                       |
| 8 Experiment               | 1D                                                                                         |
| 9 Probe                    | 5 mm PABBO BB/ 19F-1H/ D Z-GRD Z108618/ 0610                                               |
| 10 Number of Scans         | 32                                                                                         |
| 11 Receiver Gain           | 146                                                                                        |
| 12 Relaxation Delay        | 1.0000                                                                                     |
| 13 Pulse Width             | 15.0000                                                                                    |
| 14 Presaturation Frequency |                                                                                            |
| 15 Acquisition Time        | 4.0894                                                                                     |
| 16 Acquisition Date        | 2018-11-29T10:13:00                                                                        |
| 17 Modification Date       | 2018-11-29T10:13:55                                                                        |
| 18 Spectrometer Frequency  | 400.19                                                                                     |
| 19 Spectral Width          | 8012.8                                                                                     |
| 20 Lowest Frequency        | -1535.1                                                                                    |
| 21 Nucleus                 | 1H                                                                                         |
| 22 Acquired Size           | 32768                                                                                      |
| 23 Spectral Size           | 65536                                                                                      |

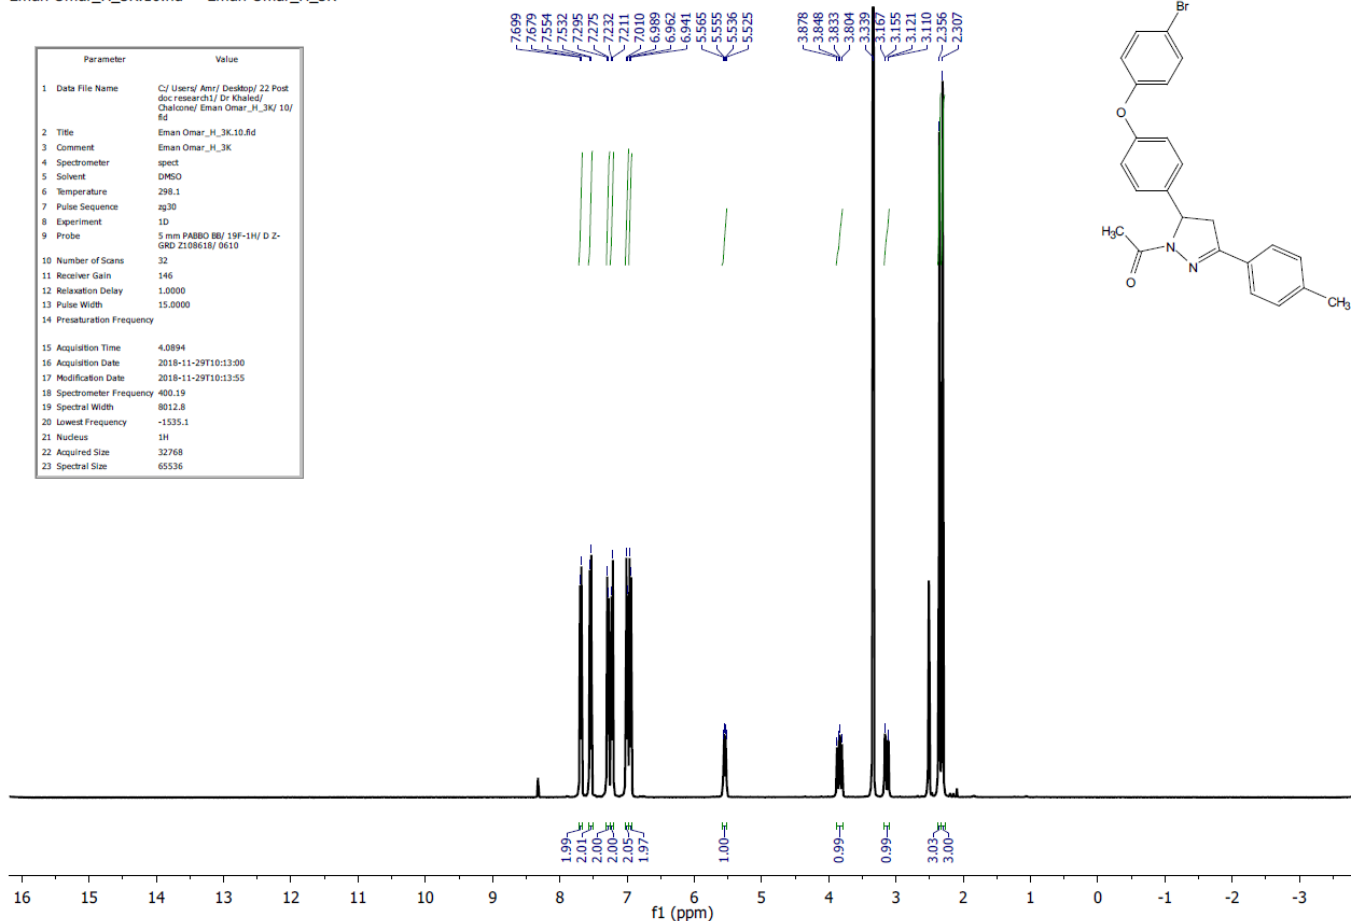

Eman Omar\_C\_3K.10.fid — Eman Omar\_C\_3K

| Parameter                  | Value                                                                                      |
|----------------------------|--------------------------------------------------------------------------------------------|
| 1 Data File Name           | C:/Users/Amer/Desktop/22 Post doc research/1/ Dr Khaled/ Chalcone/ Eman Omar_C_3K/ 10/ fid |
| 2 Title                    | Eman Omar_C_3K.10.fid                                                                      |
| 3 Comment                  | Eman Omar_C_3K                                                                             |
| 4 Spectrometer             | spect                                                                                      |
| 5 Solvent                  | DMSO                                                                                       |
| 6 Temperature              | 298.1                                                                                      |
| 7 Pulse Sequence           | apzg30                                                                                     |
| 8 Experiment               | 1D                                                                                         |
| 9 Probe                    | 5 mm PABBO BB/ 19F-1H/ D Z-GRD Z108618/ 0610                                               |
| 10 Number of Scans         | 1200                                                                                       |
| 11 Receiver Gain           | 202                                                                                        |
| 12 Relaxation Delay        | 2.0000                                                                                     |
| 13 Pulse Width             | 10.0000                                                                                    |
| 14 Presaturation Frequency |                                                                                            |
| 15 Acquisition Time        | 1.3631                                                                                     |
| 16 Acquisition Date        | 2018-12-10T20:44:00                                                                        |
| 17 Modification Date       | 2018-12-10T20:44:42                                                                        |
| 18 Spectrometer Frequency  | 100.64                                                                                     |
| 19 Spectral Width          | 24038.5                                                                                    |
| 20 Lowest Frequency        | -1952.4                                                                                    |
| 21 Nucleus                 | 13C                                                                                        |
| 22 Acquired Size           | 32768                                                                                      |
| 23 Spectral Size           | 65536                                                                                      |

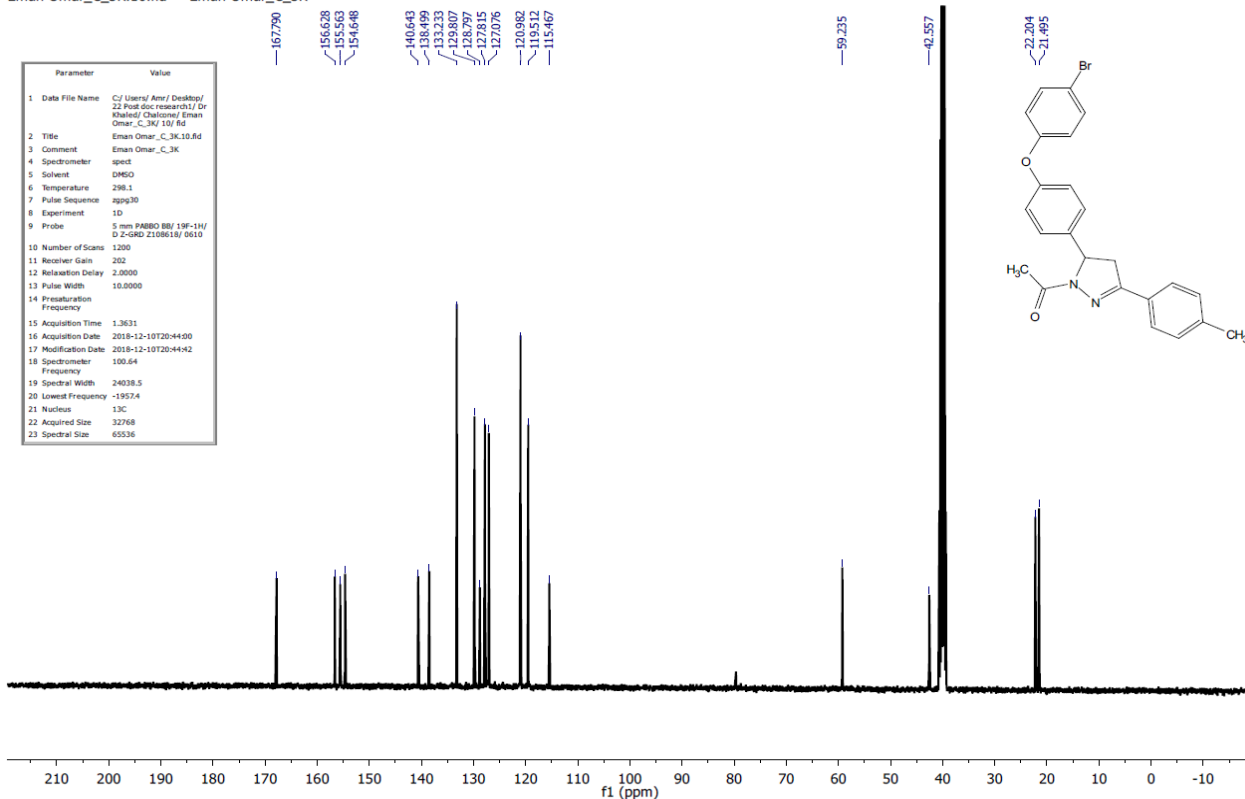

# Compound 3d

Rasha Ahmed\_H\_1P.10.fid — Rasha Ahmed\_H\_1P

| Parameter                  | Value                                                                                              |
|----------------------------|----------------------------------------------------------------------------------------------------|
| 1 Data File Name           | C:\Users\Ame\ Desktop\ 22 Post doc research\ 4- Dr Khalef\ Chalcone\ NMR\ Rasha Ahmed_H_1P\ 10.fid |
| 2 Title                    | Rasha Ahmed_H_1P.10.fid                                                                            |
| 3 Comment                  | Rasha Ahmed_H_1P                                                                                   |
| 4 Spectrometer             | spect                                                                                              |
| 5 Solvent                  | DMSO                                                                                               |
| 6 Temperature              | 298.0                                                                                              |
| 7 Pulse Sequence           | zg30                                                                                               |
| 8 Experiment               | 1D                                                                                                 |
| 9 Probe                    | 5 mm PABBO BB/ 19F-1H/ D 2-GRD Z108618/ 0610                                                       |
| 10 Number of Scans         | 32                                                                                                 |
| 11 Receiver Gain           | 169                                                                                                |
| 12 Relaxation Delay        | 1.0000                                                                                             |
| 13 Pulse Width             | 15.0000                                                                                            |
| 14 Presaturation Frequency |                                                                                                    |
| 15 Acquisition Time        | 4.8894                                                                                             |
| 16 Acquisition Date        | 2018-12-25T12:30:00                                                                                |
| 17 Modification Date       | 2018-12-25T12:30:28                                                                                |
| 18 Spectrometer Frequency  | 400.19                                                                                             |
| 19 Spectral Width          | 8012.8                                                                                             |
| 20 Lowest Frequency        | -1535.1                                                                                            |
| 21 Nucleus                 | 1H                                                                                                 |
| 22 Acquired Size           | 32768                                                                                              |
| 23 Spectral Size           | 65536                                                                                              |

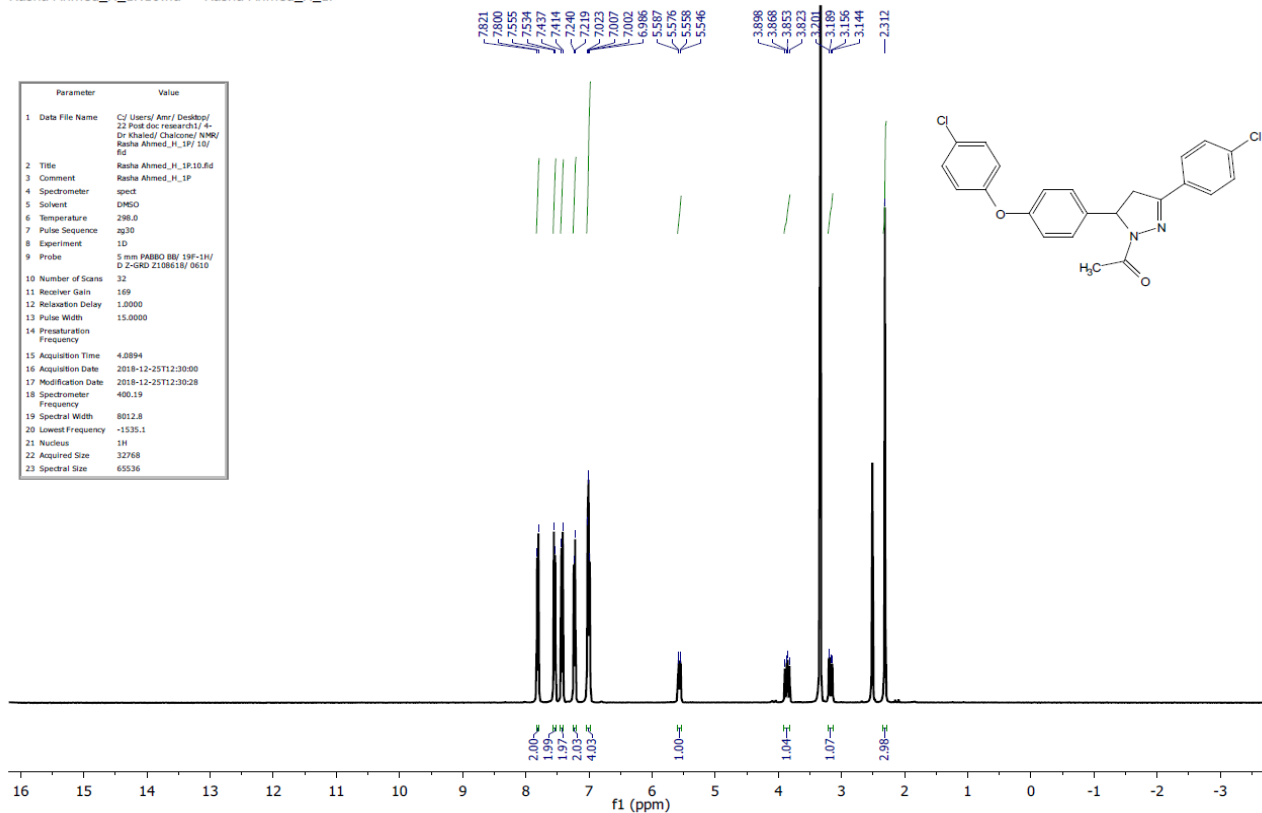

Rasha Ahmed\_C\_1P.10.fid — Rasha Ahmed\_C\_1P

| Parameter                  | Value                                                                                              |
|----------------------------|----------------------------------------------------------------------------------------------------|
| 1 Data File Name           | C:\Users\Ame\ Desktop\ 22 Post doc research\ 4- Dr Khalef\ Chalcone\ NMR\ Rasha Ahmed_C_1P\ 10.fid |
| 2 Title                    | Rasha Ahmed_C_1P.10.fid                                                                            |
| 3 Comment                  | Rasha Ahmed_C_1P                                                                                   |
| 4 Spectrometer             | spect                                                                                              |
| 5 Solvent                  | DMSO                                                                                               |
| 6 Temperature              | 298.1                                                                                              |
| 7 Pulse Sequence           | zgpg30                                                                                             |
| 8 Experiment               | 1D                                                                                                 |
| 9 Probe                    | 5 mm PABBO BB/ 19F-1H/ D 2-GRD Z108618/ 0610                                                       |
| 10 Number of Scans         | 1200                                                                                               |
| 11 Receiver Gain           | 202                                                                                                |
| 12 Relaxation Delay        | 2.0000                                                                                             |
| 13 Pulse Width             | 10.0000                                                                                            |
| 14 Presaturation Frequency |                                                                                                    |
| 15 Acquisition Time        | 1.3631                                                                                             |
| 16 Acquisition Date        | 2019-01-02T22:01:00                                                                                |
| 17 Modification Date       | 2019-01-02T22:01:03                                                                                |
| 18 Spectrometer Frequency  | 100.64                                                                                             |
| 19 Spectral Width          | 24038.5                                                                                            |
| 20 Lowest Frequency        | -1957.4                                                                                            |
| 21 Nucleus                 | 13C                                                                                                |
| 22 Acquired Size           | 32768                                                                                              |
| 23 Spectral Size           | 65536                                                                                              |

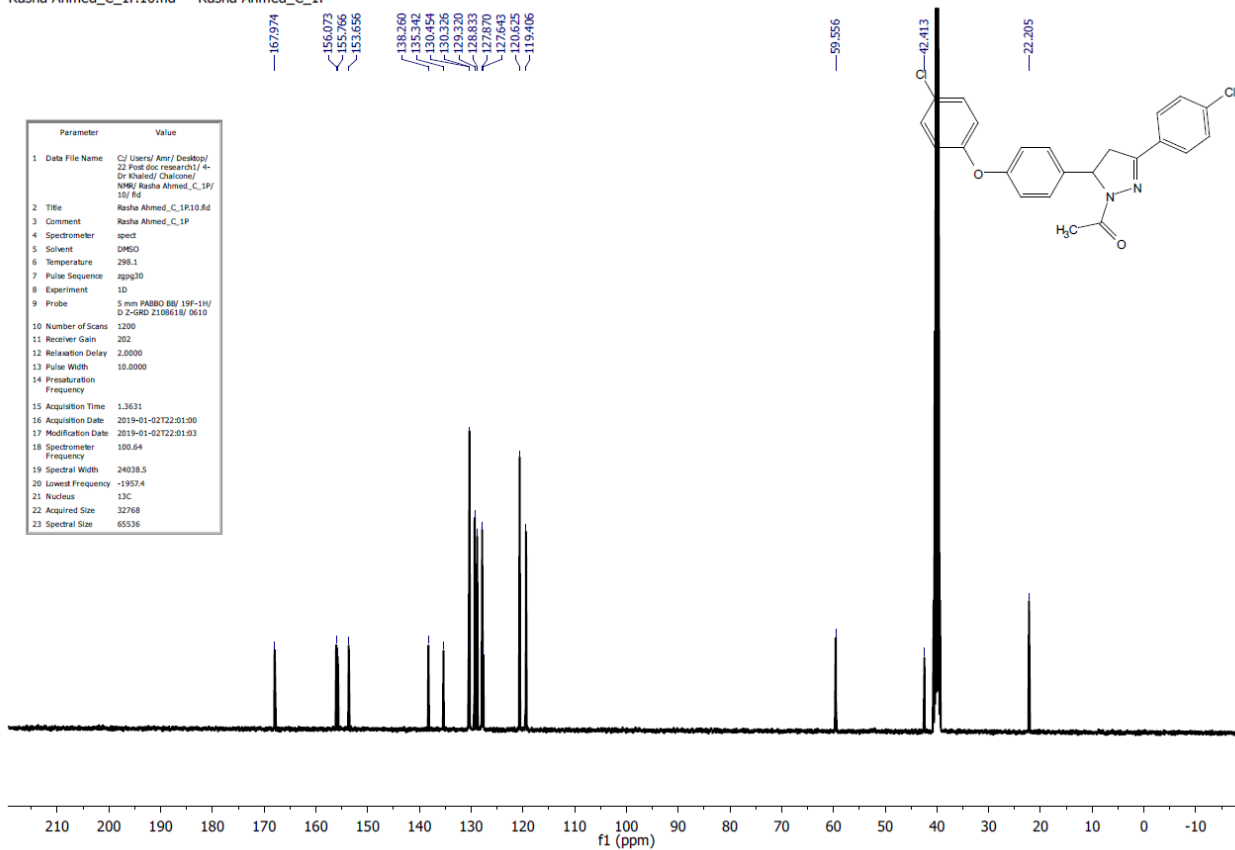

# Compound 3e

Rasha Ahmed\_H\_2P.10.fid — Rasha Ahmed\_H\_2P

| Parameter                  | Value                                                                                            |
|----------------------------|--------------------------------------------------------------------------------------------------|
| 1 Data File Name           | C:/Users/Amer/Desktop/22 Post.doc research/1/4-Dr Khaled/Chatone/ NMR/ Rasha Ahmed_H_2P/ 10/ fid |
| 2 Title                    | Rasha Ahmed_H_2P.10.fid                                                                          |
| 3 Comment                  | Rasha Ahmed_H_2P                                                                                 |
| 4 Spectrometer             | spect                                                                                            |
| 5 Solvent                  | DMSO                                                                                             |
| 6 Temperature              | 298.1                                                                                            |
| 7 Pulse Sequence           | zgpg30                                                                                           |
| 8 Experiment               | 1D                                                                                               |
| 9 Probe                    | 5 mm PABBO BB/ 19F-1H/ D Z-GRO ZJ0631/ 5015                                                      |
| 10 Number of Scans         | 32                                                                                               |
| 11 Receiver Gain           | 169                                                                                              |
| 12 Relaxation Delay        | 1.0000                                                                                           |
| 13 Pulse Width             | 15.0000                                                                                          |
| 14 Presaturation Frequency |                                                                                                  |
| 15 Acquisition Time        | 4.0894                                                                                           |
| 16 Acquisition Date        | 2018-12-25T12:35:00                                                                              |
| 17 Modification Date       | 2018-12-25T12:35:41                                                                              |
| 18 Spectrometer Frequency  | 400.19                                                                                           |
| 19 Spectral Width          | 8012.8                                                                                           |
| 20 Lowest Frequency        | -1535.1                                                                                          |
| 21 Nucleus                 | 1H                                                                                               |
| 22 Acquired Size           | 32768                                                                                            |
| 23 Spectral Size           | 65536                                                                                            |

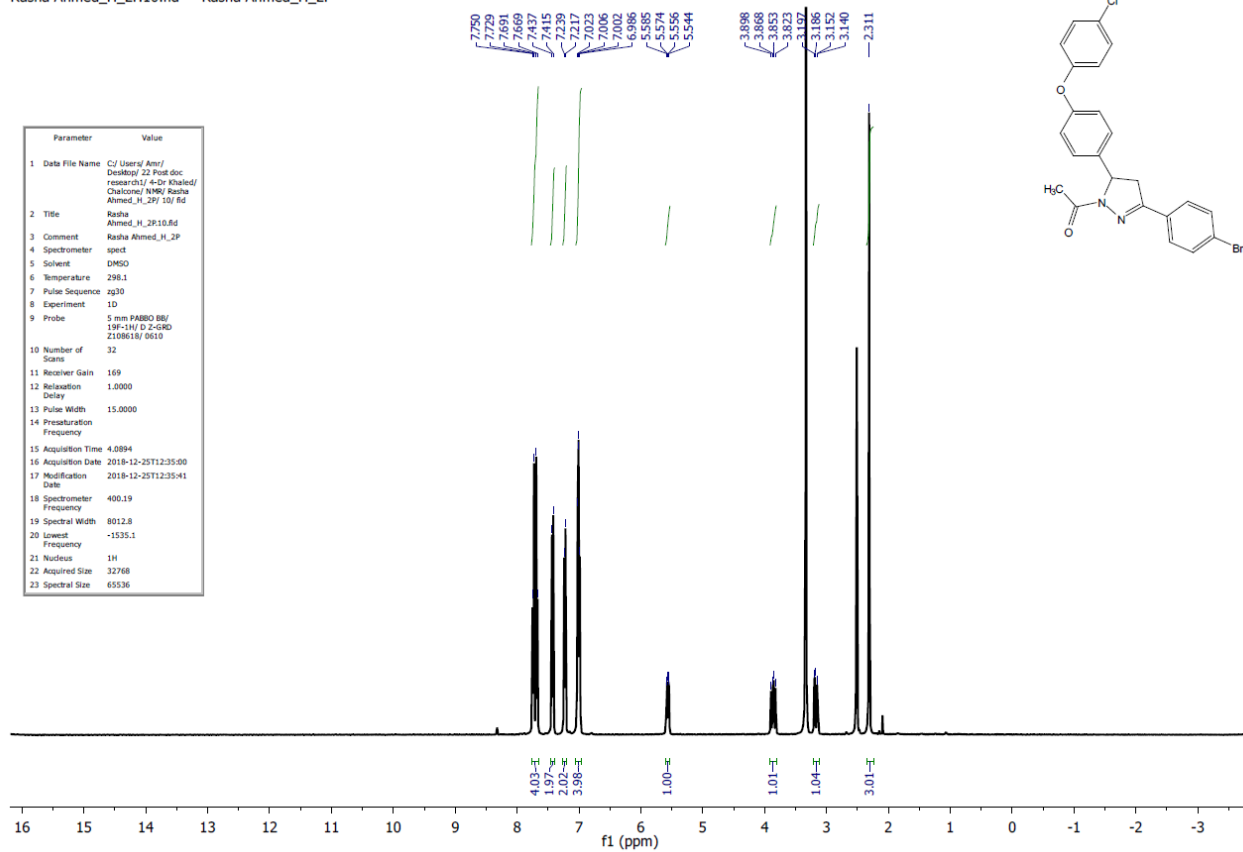

Rasha Ahmed\_C\_2P.10.fid — Rasha Ahmed\_C\_2P

| Parameter                  | Value                                                                                            |
|----------------------------|--------------------------------------------------------------------------------------------------|
| 1 Data File Name           | C:/Users/Amer/Desktop/22 Post.doc research/1/4-Dr Khaled/Chatone/ NMR/ Rasha Ahmed_C_2P/ 10/ fid |
| 2 Title                    | Rasha Ahmed_C_2P.10.fid                                                                          |
| 3 Comment                  | Rasha Ahmed_C_2P                                                                                 |
| 4 Spectrometer             | spect                                                                                            |
| 5 Solvent                  | DMSO                                                                                             |
| 6 Temperature              | 298.1                                                                                            |
| 7 Pulse Sequence           | zgpg30                                                                                           |
| 8 Experiment               | 1D                                                                                               |
| 9 Probe                    | 5 mm PABBO BB/ 19F-1H/ D Z-GRO ZJ0631/ 5015                                                      |
| 10 Number of Scans         | 1200                                                                                             |
| 11 Receiver Gain           | 302                                                                                              |
| 12 Relaxation Delay        | 2.0000                                                                                           |
| 13 Pulse Width             | 10.0000                                                                                          |
| 14 Presaturation Frequency |                                                                                                  |
| 15 Acquisition Time        | 1.3631                                                                                           |
| 16 Acquisition Date        | 2019-01-02T22:12:00                                                                              |
| 17 Modification Date       | 2019-01-02T22:12:22                                                                              |
| 18 Spectrometer Frequency  | 100.64                                                                                           |
| 19 Spectral Width          | 24038.5                                                                                          |
| 20 Lowest Frequency        | -1957.4                                                                                          |
| 21 Nucleus                 | 13C                                                                                              |
| 22 Acquired Size           | 32768                                                                                            |
| 23 Spectral Size           | 65536                                                                                            |

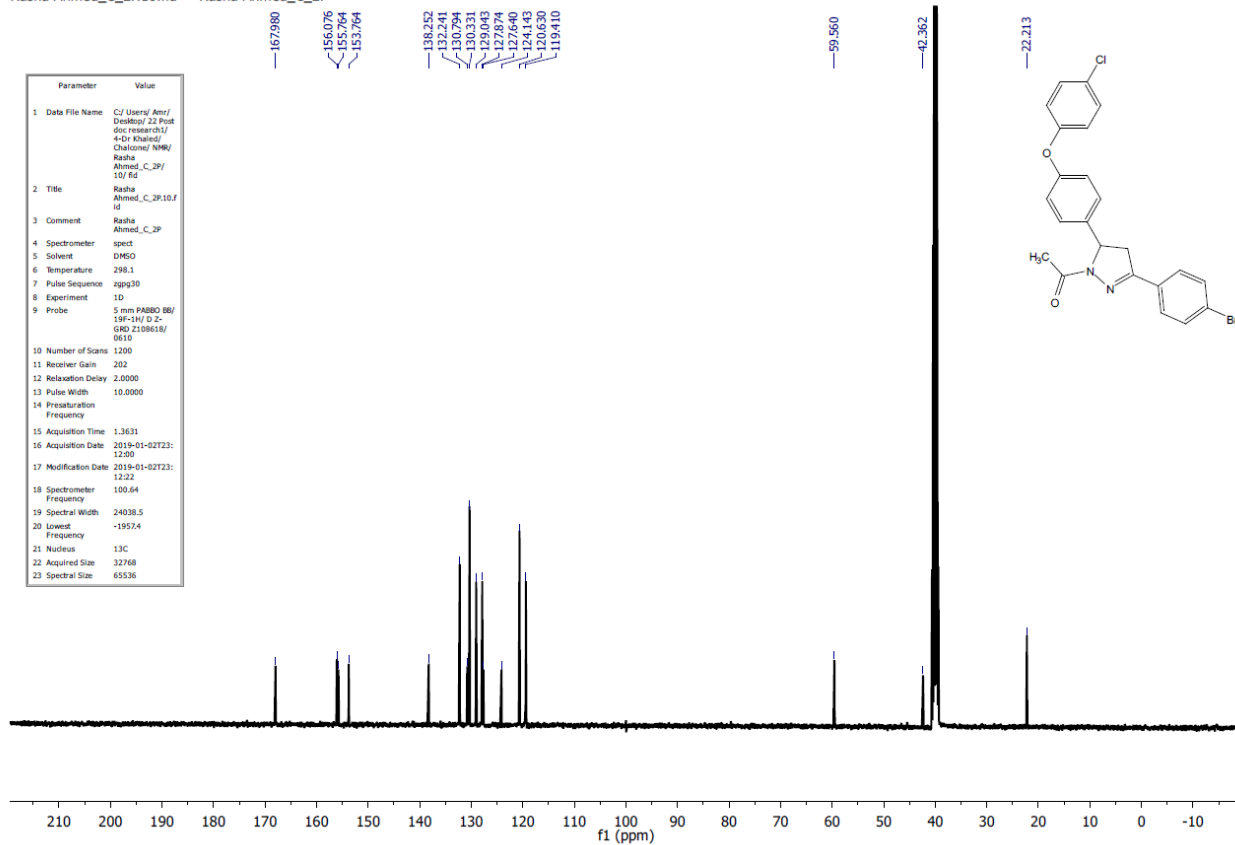

# Compound 3f

Rasha Ahmed\_H\_3P.10.fid — Rasha Ahmed\_H\_3P

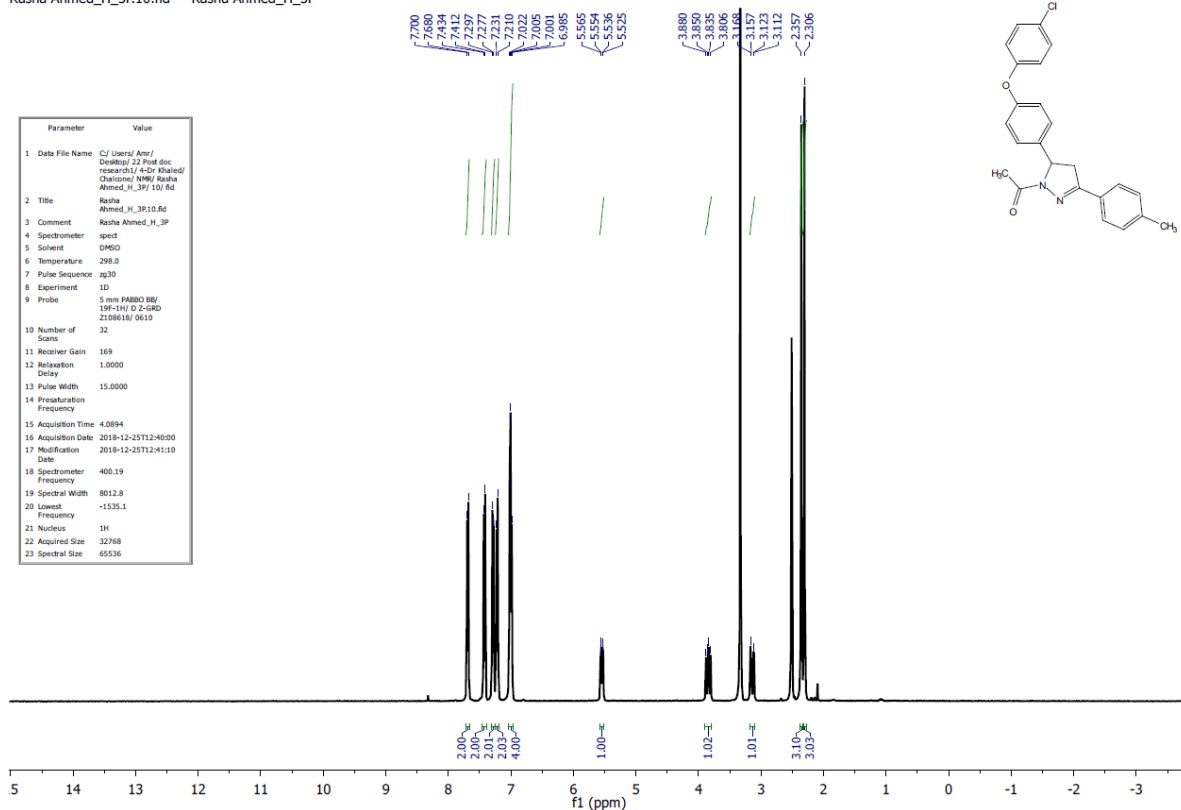

Rasha Ahmed\_C\_3P.10.fid — Rasha Ahmed\_C\_3P

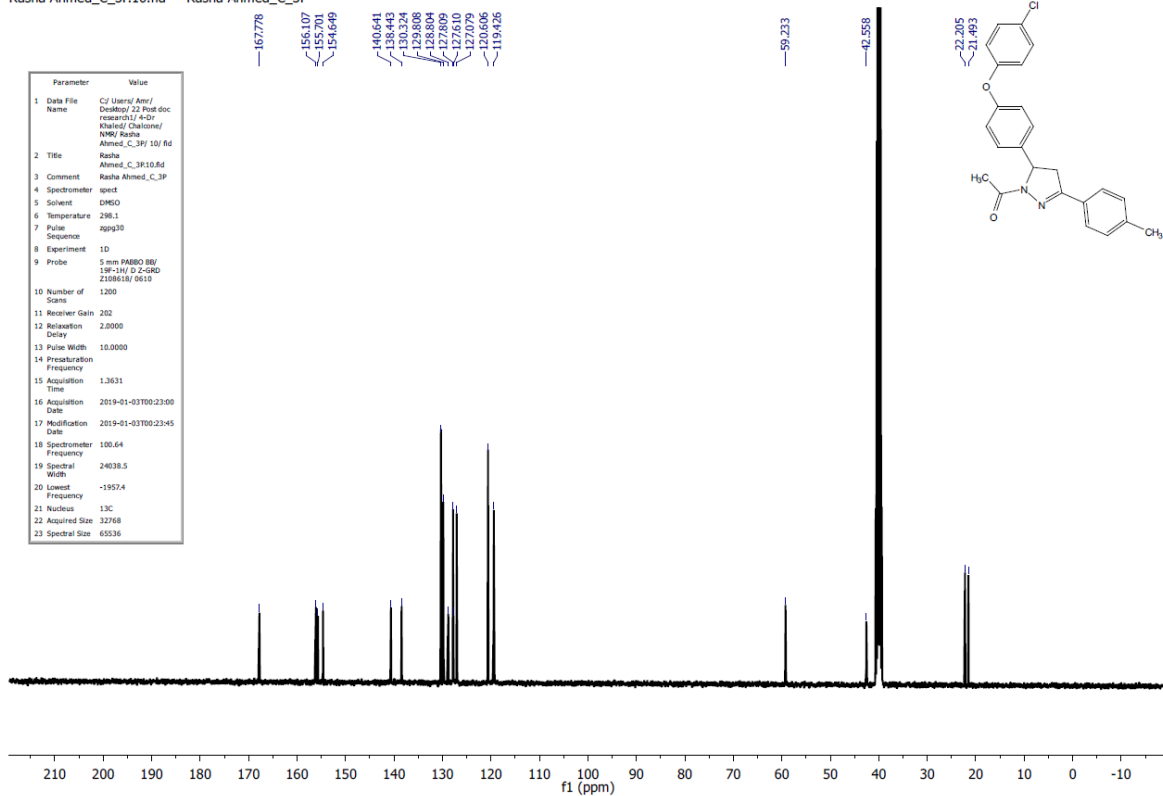

Supplement: IENZ_A_1998023_SM6286.pdf [file IENZ_A_1998023_SM6286.pdf]
